# Supplementary material
Source: PubMed Central journal article supplement (PMC4247810)
Supplement: NIHMS607638-supplement-01.pdf [file NIHMS607638-supplement-01.pdf]

714 **SUPPLEMENTARY MATERIAL**

715

716 Table S1. NeuroPsychological Motor coordination Test scores.

| <b>Variable</b>             | <b>Levels</b> | <b>n</b> | <b>Min</b> | <b>1st Q.le</b> | <b>Mean</b> | <b>Median</b> | <b>3rd Q.le</b> | <b>Max</b> | <b>IQR</b> | <b>#NA</b> |
|-----------------------------|---------------|----------|------------|-----------------|-------------|---------------|-----------------|------------|------------|------------|
| Luria<br>Nebraska<br>Task 1 | VC            | 152      | 5.00       | 14.00           | 16.92       | 17.00         | 20.00           | 30.00      | 6.00       | 1          |
|                             | GL            | 102      | 11.00      | 15.00           | 18.63       | 18.00         | 22.00           | 31.00      | 7.00       | 0          |
|                             | all           | 254      | 5.00       | 14.00           | 17.61       | 17.00         | 20.75           | 31.00      | 6.75       | 1          |
| Luria<br>Nebraska<br>Task 2 | VC            | 152      | 6.00       | 14.00           | 17.30       | 17.00         | 20.00           | 30.00      | 6.00       | 1          |
|                             | GL            | 102      | 9.00       | 16.00           | 19.00       | 18.50         | 21.75           | 32.00      | 5.75       | 0          |
|                             | all           | 254      | 6.00       | 15.00           | 17.98       | 18.00         | 21.00           | 32.00      | 6.00       | 1          |
| Luria<br>Nebraska<br>Task 3 | VC            | 152      | 0.00       | 7.00            | 9.43        | 9.00          | 11.00           | 30.00      | 4.00       | 1          |
|                             | GL            | 102      | 3.00       | 7.00            | 9.60        | 9.50          | 12.00           | 19.00      | 5.00       | 0          |
|                             | all           | 254      | 0.00       | 7.00            | 9.50        | 9.00          | 11.00           | 30.00      | 4.00       | 1          |
| Luria<br>Nebraska<br>Task 4 | VC            | 152      | 2.00       | 3.00            | 4.30        | 4.00          | 5.00            | 9.00       | 2.00       | 1          |
|                             | GL            | 102      | 1.00       | 4.00            | 4.88        | 5.00          | 6.00            | 11.00      | 2.00       | 0          |
|                             | all           | 254      | 1.00       | 4.00            | 4.53        | 4.00          | 5.00            | 11.00      | 1.00       | 1          |
| Luria<br>Nebraska<br>Task 5 | VC            | 152      | 2.00       | 3.00            | 4.27        | 4.00          | 5.00            | 9.00       | 2.00       | 1          |
|                             | GL            | 102      | 2.00       | 4.00            | 4.75        | 5.00          | 5.75            | 10.00      | 1.75       | 0          |
|                             | all           | 254      | 2.00       | 4.00            | 4.46        | 4.50          | 5.00            | 10.00      | 1.00       | 1          |
| Luria<br>Nebraska<br>Sum    | VC            | 152      | 24.00      | 43.00           | 52.22       | 53.00         | 61.00           | 89.00      | 18.00      | 1          |
|                             | GL            | 102      | 33.00      | 48.25           | 56.85       | 56.00         | 65.00           | 81.00      | 16.75      | 0          |
|                             | all           | 254      | 24         | 45.00           | 54.08       | 54.00         | 63.00           | 89.00      | 18.00      | 1          |
| Luria<br>Nebraska<br>Mean   | VC            | 152      | 4.80       | 8.60            | 10.44       | 10.60         | 12.20           | 17.80      | 3.60       | 1          |
|                             | GL            | 102      | 6.60       | 9.65            | 11.37       | 11.20         | 13.00           | 16.20      | 3.35       | 0          |
|                             | all           | 254      | 4.80       | 9.00            | 10.82       | 10.80         | 12.60           | 17.80      | 3.60       | 1          |

717

718

719 Table S2. NeuroPsychological cognitive assessment

| Variable                   | Levels | n   | Min    | 1st q.le | Mean  | Median | 3rd q.le | Max    | IOR   |
|----------------------------|--------|-----|--------|----------|-------|--------|----------|--------|-------|
| CPM raw score              | VC     | 153 | 11.00  | 21.00    | 24.74 | 24.00  | 28.00    | 35.00  | 7.00  |
|                            | GL     | 102 | 11.00  | 22.00    | 25.61 | 25.50  | 30.00    | 45.00  | 8.00  |
|                            | all    | 255 | 11.00  | 22.00    | 25.09 | 25.00  | 28.00    | 45.00  | 6.00  |
| CPM percentile             | VC     | 153 | -2.91  | -0.88    | -0.10 | -0.07  | 0.53     | 2.06   | 1.41  |
|                            | GL     | 102 | -2.70  | -0.52    | 0.06  | -0.04  | 0.53     | 1.95   | 1.05  |
|                            | all    | 255 | -2.91  | -0.68    | -0.03 | -0.07  | 0.53     | 2.06   | 1.21  |
| MMSE raw score             | VC     | 153 | 22.00  | 27.00    | 27.64 | 28.00  | 29.00    | 30.00  | 2.00  |
|                            | GL     | 102 | 19.00  | 27.00    | 27.61 | 28.00  | 29.00    | 30.00  | 2.00  |
|                            | all    | 255 | 19.00  | 27.00    | 27.63 | 28.00  | 29.00    | 30.00  | 2.00  |
| MMSE correct score         | VC     | 153 | 23.49  | 28.20    | 28.86 | 29.20  | 30.03    | 33.24  | 1.83  |
|                            | GL     | 102 | 20.27  | 27.86    | 28.66 | 29.02  | 30.03    | 32.03  | 2.17  |
|                            | all    | 252 | 20.27  | 28.03    | 28.80 | 29.03  | 30.03    | 33.24  | 2.00  |
| Story Recall raw score     | VC     | 153 | 1.00   | 6.50     | 8.68  | 8.50   | 10.50    | 20.50  | 4.00  |
|                            | GL     | 102 | 0.00   | 7.00     | 9.40  | 8.75   | 12.00    | 21.50  | 5.00  |
|                            | all    | 255 | 0.00   | 6.50     | 8.97  | 8.50   | 11.00    | 21.50  | 4.50  |
| Story Recall correct score | VC     | 153 | 5.00   | 9.50     | 11.73 | 11.50  | 13.50    | 22.00  | 4.00  |
|                            | GL     | 102 | 0.00   | 9.50     | 11.79 | 11.50  | 14.00    | 20.50  | 4.50  |
|                            | all    | 255 | 0.00   | 9.50     | 11.75 | 11.50  | 14.00    | 22.00  | 4.50  |
| Story Recall equiv score   | VC     | 153 | 0.00   | 1.00     | 2.20  | 2.00   | 3.00     | 4.00   | 2.00  |
|                            | GL     | 102 | 0.00   | 1.00     | 2.24  | 2.00   | 3.00     | 4.00   | 2.00  |
|                            | all    | 255 | 0.00   | 1.00     | 2.22  | 2.00   | 3.00     | 4.00   | 2.00  |
| TMT-A corrected            | VC     | 153 | -2.00  | 18.00    | 29.68 | 26.00  | 38.00    | 104.00 | 20.00 |
|                            | GL     | 102 | -27.00 | 20.00    | 31.51 | 26.50  | 43.00    | 99.00  | 23.00 |
|                            | all    | 255 | -27.00 | 19.00    | 30.41 | 26.00  | 41.00    | 104.00 | 22.00 |
| TMT-B corrected            | VC     | 153 | -39.00 | 1.00     | 62.40 | 30.00  | 72.00    | 342.00 | 71.00 |
|                            | GL     | 102 | -37.00 | 14.25    | 72.05 | 38.50  | 84.75    | 363.00 | 70.50 |
|                            | all    | 255 | -39.00 | 3.00     | 66.26 | 32.00  | 81.00    | 363.00 | 78.00 |
| TMT B-A corrected          | VC     | 153 | -62.00 | -18.00   | 33.64 | 3.00   | 37.00    | 309.00 | 55.00 |
|                            | GL     | 102 | -76.00 | -15.25   | 40.30 | 14.50  | 54.00    | 331.00 | 69.25 |
|                            | all    | 255 | -76.00 | -17.00   | 36.31 | 9.00   | 43.00    | 331.00 | 60.00 |
| TMT-A Equiv score          | VC     | 153 | 0.00   | 4.00     | 3.73  | 4.00   | 4.00     | 4.00   | 0.00  |
|                            | GL     | 102 | 0.00   | 4.00     | 3.59  | 4.00   | 4.00     | 4.00   | 0.00  |
|                            | all    | 255 | 0.00   | 4.00     | 3.67  | 4.00   | 4.00     | 4.00   | 0.00  |
| TMT-B Equiv score          | VC     | 153 | 0.00   | 4.00     | 3.48  | 4.00   | 4.00     | 4.00   | 0.00  |
|                            | GL     | 102 | 0.00   | 4.00     | 3.42  | 4.00   | 4.00     | 4.00   | 0.00  |
|                            | all    | 255 | 0.00   | 4.00     | 3.46  | 4.00   | 4.00     | 4.00   | 0.00  |
| TMT B-A Equiv score        | VC     | 153 | 0.00   | 4.00     | 3.46  | 4.00   | 4.00     | 4.00   | 0.00  |
|                            | GL     | 102 | 0.00   | 4.00     | 3.38  | 4.00   | 4.00     | 4.00   | 0.00  |
|                            | all    | 255 | 0.00   | 4.00     | 3.43  | 4.00   | 4.00     | 4.00   | 0.00  |

720

721

722 Table S3. NeuroPsychological computerized Swedish Performance Evaluation System scores.

| Variable                       | Levels | n   | Min    | 1st q.le | Mean   | Median | 3rd q.le | Max    | IQR   | #NA |
|--------------------------------|--------|-----|--------|----------|--------|--------|----------|--------|-------|-----|
| Reaction Time Mean (msec)      | VC     | 152 | 213.00 | 270.75   | 330.91 | 305.00 | 362.75   | 708.00 | 92.00 | 1   |
|                                | GL     | 99  | 222.00 | 273.00   | 319.70 | 305.00 | 339.50   | 569.00 | 66.50 | 3   |
|                                | all    | 251 | 213.00 | 272.00   | 326.49 | 305.00 | 353.00   | 708.00 | 81.00 | 4   |
| Reaction Time StdDev           | VC     | 152 | 29.00  | 58.50    | 84.07  | 74.50  | 104.50   | 214.00 | 46.00 | 1   |
|                                | GL     | 99  | 24.00  | 53.00    | 76.47  | 71.00  | 96.50    | 165.00 | 43.50 | 3   |
|                                | all    | 251 | 24.00  | 56.00    | 81.07  | 73.00  | 102.00   | 214.00 | 46.00 | 4   |
| FT mean domHand                | VC     | 152 | 13.00  | 41.00    | 46.84  | 50.00  | 55.00    | 68.00  | 14.00 | 1   |
|                                | GL     | 99  | 23.00  | 45.00    | 49.02  | 50.00  | 55.00    | 67.00  | 10.00 | 3   |
|                                | all    | 251 | 13.00  | 42.00    | 47.70  | 50.00  | 55.00    | 68.00  | 13.00 | 4   |
| FT mean non-domHand            | VC     | 152 | 13.00  | 39.75    | 44.11  | 47.00  | 51.00    | 64.00  | 11.25 | 1   |
|                                | GL     | 99  | 23.00  | 40.50    | 45.43  | 46.00  | 52.00    | 63.00  | 11.50 | 3   |
|                                | all    | 251 | 13.00  | 40.00    | 44.63  | 46.00  | 51.00    | 64.00  | 11.00 | 4   |
| Digit Symbol-Raw score         | VC     | 153 | 10.00  | 27.00    | 35.54  | 34.00  | 43.00    | 71.00  | 16.00 | 0   |
|                                | GL     | 99  | 6.00   | 26.00    | 37.27  | 37.00  | 47.50    | 65.00  | 21.50 | 3   |
|                                | all    | 252 | 6.00   | 27.00    | 36.22  | 35.00  | 45.00    | 71.00  | 18.00 | 3   |
| Digit Symbol Correct scores    | VC     | 153 | 5.00   | 8.00     | 10.12  | 10.00  | 12.00    | 18.00  | 4.00  | 0   |
|                                | GL     | 99  | 3.00   | 9.00     | 10.97  | 11.00  | 13.00    | 17.00  | 4.00  | 3   |
|                                | all    | 252 | 3.00   | 8.00     | 10.45  | 10.00  | 13.00    | 18.00  | 5.00  | 3   |
| Digit Span Forward             | VC     | 153 | 3.00   | 5.00     | 5.35   | 5.00   | 6.00     | 9.00   | 1.00  | 0   |
|                                | GL     | 99  | 3.00   | 5.00     | 5.25   | 5.00   | 6.00     | 8.00   | 1.00  | 3   |
|                                | all    | 252 | 3.00   | 5.00     | 5.31   | 5.00   | 6.00     | 9.00   | 1.00  | 3   |
| Digit Span Backward            | VC     | 153 | 2.00   | 3.00     | 3.41   | 3.00   | 4.00     | 6.00   | 1.00  | 0   |
|                                | GL     | 99  | 2.00   | 3.00     | 3.42   | 3.00   | 4.00     | 5.00   | 1.00  | 3   |
|                                | all    | 252 | 2.00   | 3.00     | 3.41   | 3.00   | 4.00     | 6.00   | 1.00  | 3   |
| Digit Span Correct Total Score | VC     | 153 | 3.00   | 6.00     | 7.45   | 8.00   | 9.00     | 14.00  | 3.00  | 0   |
|                                | GL     | 99  | 3.00   | 6.00     | 7.49   | 8.00   | 9.00     | 12.00  | 3.00  | 3   |
|                                | all    | 252 | 3.00   | 6.00     | 7.47   | 8.00   | 9.00     | 14.00  | 3.00  | 3   |

724 Table S4. NeuroPsychological Tremor assessment.

| Variable            | Levels | n   | Min   | 1st q.le | Mean  | Median | 3rd q.le | Max   | IQR   | #NA |
|---------------------|--------|-----|-------|----------|-------|--------|----------|-------|-------|-----|
| Tremor Intensity R  | VC     | 132 | 0.040 | 0.090    | 0.128 | 0.115  | 0.153    | 0.300 | 0.063 | 21  |
|                     | GL     | 101 | 0.050 | 0.100    | 0.140 | 0.120  | 0.150    | 0.440 | 0.050 | 1   |
|                     | All    | 233 | 0.040 | 0.100    | 0.133 | 0.120  | 0.150    | 0.440 | 0.050 | 22  |
| Central Frequency R | VC     | 132 | 3.70  | 5.55     | 6.78  | 6.60   | 7.68     | 11.90 | 2.13  | 21  |
|                     | GL     | 101 | 4.10  | 5.70     | 6.72  | 6.50   | 7.50     | 11.20 | 1.80  | 1   |
|                     | All    | 233 | 3.70  | 5.60     | 6.75  | 6.50   | 7.50     | 11.90 | 1.90  | 22  |
| Tremor StDev R      | VC     | 132 | 1.50  | 2.60     | 3.20  | 3.20   | 3.83     | 5.00  | 1.23  | 21  |
|                     | GL     | 101 | 0.70  | 2.70     | 3.28  | 3.30   | 3.90     | 5.00  | 1.20  | 1   |
|                     | All    | 233 | 0.70  | 2.60     | 3.24  | 3.20   | 3.90     | 5.00  | 1.30  | 22  |
| Harmonic Index R    | VC     | 132 | 0.750 | 0.850    | 0.883 | 0.880  | 0.920    | 0.980 | 0.070 | 21  |
|                     | GL     | 101 | 0.740 | 0.840    | 0.879 | 0.880  | 0.920    | 0.980 | 0.080 | 1   |
|                     | All    | 233 | 0.740 | 0.850    | 0.881 | 0.880  | 0.920    | 0.980 | 0.070 | 22  |
| Tremor Intensity L  | VC     | 132 | 0.060 | 0.090    | 0.129 | 0.120  | 0.150    | 0.420 | 0.060 | 21  |
|                     | GL     | 101 | 0.060 | 0.100    | 0.179 | 0.120  | 0.160    | 2.590 | 0.060 | 1   |
|                     | All    | 233 | 0.060 | 0.090    | 0.151 | 0.120  | 0.150    | 2.590 | 0.060 | 22  |
| Central Frequency L | VC     | 132 | 3.20  | 5.70     | 6.81  | 6.50   | 7.53     | 11.80 | 1.83  | 21  |
|                     | GL     | 101 | 4.10  | 5.90     | 7.00  | 6.70   | 8.00     | 10.70 | 2.10  | 1   |
|                     | All    | 233 | 3.2   | 5.80     | 6.89  | 6.50   | 7.90     | 11.80 | 2.10  | 22  |
| Tremor StDev L      | VC     | 132 | 1.00  | 2.70     | 3.27  | 3.40   | 3.90     | 5.40  | 1.20  | 21  |
|                     | GL     | 101 | 0.50  | 2.80     | 3.39  | 3.40   | 4.00     | 5.20  | 1.20  | 1   |
|                     | All    | 233 | 0.50  | 2.70     | 3.33  | 3.40   | 3.90     | 5.40  | 1.20  | 22  |
| Harmonic Index L    | VC     | 132 | 0.750 | 0.840    | 0.872 | 0.870  | 0.900    | 0.980 | 0.060 | 21  |
|                     | GL     | 101 | 0.750 | 0.840    | 0.867 | 0.870  | 0.900    | 0.980 | 0.060 | 1   |
|                     | All    | 233 | 0.750 | 0.840    | 0.870 | 0.870  | 0.900    | 0.980 | 0.060 | 22  |

725

726

727

728 Table S5 . NeuroPsychological Body Sway assessment.

| Variable          | Levels | n   | Min   | 1 <sup>st</sup> q.le | Mean   | Median | 3 <sup>rd</sup> q.le | Max     | IQR    | #NA |
|-------------------|--------|-----|-------|----------------------|--------|--------|----------------------|---------|--------|-----|
| Mean Sway OE      | VC     | 132 | 1.90  | 4.20                 | 5.33   | 5.30   | 6.13                 | 11.20   | 1.93   | 21  |
|                   | GL     | 101 | 1.70  | 4.10                 | 5.39   | 5.10   | 6.80                 | 9.60    | 2.70   | 1   |
|                   | all    | 233 | 1.70  | 4.20                 | 5.35   | 5.30   | 6.30                 | 11.20   | 2.10   | 22  |
| Transversal OE    | VC     | 132 | 1.00  | 2.40                 | 3.14   | 2.90   | 3.73                 | 7.60    | 1.33   | 21  |
|                   | GL     | 101 | 0.80  | 2.40                 | 3.11   | 3.00   | 3.90                 | 6.20    | 1.50   | 1   |
|                   | all    | 233 | 0.80  | 2.40                 | 3.13   | 2.90   | 3.80                 | 7.60    | 1.40   | 22  |
| Sagittal OE       | VC     | 132 | 1.10  | 2.78                 | 3.58   | 3.40   | 4.23                 | 7.00    | 1.45   | 21  |
|                   | GL     | 101 | 1.00  | 2.60                 | 3.71   | 3.30   | 4.60                 | 7.80    | 2.00   | 1   |
|                   | all    | 233 | 1.00  | 2.70                 | 3.64   | 3.40   | 4.40                 | 7.80    | 1.70   | 22  |
| Sway Area OE      | VC     | 132 | 37.00 | 210.75               | 330.48 | 284.50 | 396.25               | 1558.00 | 185.50 | 21  |
|                   | GL     | 101 | 23.00 | 184.00               | 338.41 | 260.00 | 427.00               | 1307.00 | 243.00 | 1   |
|                   | all    | 233 | 23.00 | 190.00               | 333.92 | 279.00 | 407.00               | 1558.00 | 217.00 | 22  |
| Sway Velocity OE  | VC     | 132 | 3.00  | 9.25                 | 12.05  | 11.20  | 14.33                | 38.00   | 5.08   | 21  |
|                   | GL     | 101 | 2.70  | 8.90                 | 11.99  | 11.20  | 14.50                | 39.50   | 5.60   | 1   |
|                   | all    | 233 | 2.70  | 9.00                 | 12.02  | 11.20  | 14.40                | 39.50   | 5.40   | 22  |
| Sway Intensity OE | VC     | 132 | 1.57  | 4.01                 | 5.68   | 4.83   | 6.11                 | 48.00   | 2.10   | 21  |
|                   | GL     | 101 | 1.13  | 3.73                 | 4.93   | 4.85   | 5.75                 | 11.34   | 2.02   | 1   |
|                   | all    | 233 | 1.13  | 3.91                 | 5.35   | 4.85   | 6.04                 | 48.00   | 2.13   | 22  |
| Mean Sway CE      | VC     | 132 | 2.40  | 4.38                 | 5.79   | 5.55   | 6.90                 | 20.10   | 2.53   | 21  |
|                   | GL     | 101 | 1.40  | 4.60                 | 6.04   | 5.70   | 7.00                 | 13.20   | 2.40   | 1   |
|                   | all    | 233 | 1.40  | 4.50                 | 5.90   | 5.70   | 7.00                 | 20.10   | 2.50   | 22  |
| Transversal CE    | VC     | 132 | 1.00  | 2.58                 | 3.56   | 3.35   | 4.33                 | 14.50   | 1.75   | 21  |
|                   | GL     | 101 | 0.90  | 2.70                 | 3.71   | 3.50   | 4.40                 | 8.50    | 1.70   | 1   |
|                   | all    | 233 | 0.90  | 2.60                 | 3.63   | 3.50   | 4.40                 | 14.50   | 1.80   | 22  |
| Sagittal CE       | VC     | 132 | 1.20  | 2.80                 | 3.78   | 3.65   | 4.33                 | 10.90   | 1.53   | 21  |
|                   | GL     | 101 | 0.90  | 2.90                 | 3.96   | 3.80   | 4.70                 | 9.30    | 1.80   | 1   |
|                   | all    | 233 | 0.90  | 2.90                 | 3.86   | 3.70   | 4.50                 | 10.90   | 1.60   | 22  |
| Sway Area CE      | VC     | 132 | 57.00 | 211.25               | 467.40 | 357.50 | 565.25               | 5056.00 | 354.00 | 21  |
|                   | GL     | 101 | 21.00 | 234.00               | 506.22 | 363.00 | 522.00               | 3770.00 | 288.00 | 1   |
|                   | all    | 233 | 21.00 | 213.00               | 484.23 | 358.00 | 563.00               | 5056.00 | 350.00 | 22  |
| Sway Velocity CE  | VC     | 132 | 4.90  | 11.05                | 16.13  | 14.60  | 19.28                | 45.70   | 8.23   | 21  |
|                   | GL     | 101 | 3.20  | 11.40                | 17.24  | 15.50  | 20.80                | 73.70   | 9.40   | 1   |
|                   | all    | 233 | 3.20  | 11.20                | 16.61  | 15.10  | 20.10                | 73.70   | 8.90   | 22  |
| Sway Intensity CE | VC     | 132 | 2.06  | 4.55                 | 6.03   | 5.84   | 6.94                 | 16.40   | 2.39   | 21  |
|                   | GL     | 101 | 1.22  | 4.48                 | 6.27   | 5.90   | 7.26                 | 13.57   | 2.78   | 1   |
|                   | all    | 233 | 1.22  | 4.53                 | 6.13   | 5.88   | 7.16                 | 16.40   | 2.63   | 22  |

729  
730  
731

Table S6: NeuroPsychological Sniffin Stick test.

| Variable                                 | Levels | n   | Min | 1 <sup>st</sup> q.le | Mean | Median | 3 <sup>rd</sup> q.le | Max   | IQR  | #NA |
|------------------------------------------|--------|-----|-----|----------------------|------|--------|----------------------|-------|------|-----|
| Tot proportion of correct identification | VC     | 151 | 0   | 7.50                 | 8.60 | 9.00   | 10.00                | 12.00 | 2.50 | 2   |
|                                          | GL     | 102 | 0   | 9.00                 | 9.30 | 10.00  | 11.00                | 12.00 | 2.00 | 0   |
|                                          | all    | 253 | 0   | 8.00                 | 8.88 | 9.00   | 11.00                | 12.00 | 3.00 | 2   |

732

733 Table S7: NeuroPsychological symptoms.

| Variable       | Levels | n   | Min   | 1 <sup>st</sup> q.le | Mean  | Median | 3 <sup>rd</sup> q.le | Max   | IQR   | #NA |
|----------------|--------|-----|-------|----------------------|-------|--------|----------------------|-------|-------|-----|
| Neuro-tot SUM  | VC     | 152 | 1.00  | 12.00                | 23.43 | 22.00  | 33.00                | 67.00 | 21.00 | 1   |
|                | GL     | 101 | 4.00  | 15.00                | 23.94 | 24.00  | 31.00                | 55.00 | 16.00 | 1   |
|                | all    | 253 | 1.00  | 13.00                | 23.63 | 23.00  | 32.00                | 67.00 | 19.00 | 2   |
| Neuro-tot MEAN | VC     | 152 | 0.04  | 0.43                 | 0.84  | 0.79   | 1.18                 | 2.39  | 0.75  | 1   |
|                | GL     | 101 | 0.14  | 0.54                 | 0.86  | 0.86   | 1.11                 | 1.96  | 0.57  | 1   |
|                | all    | 253 | 0.04  | 0.46                 | 0.84  | 0.82   | 1.14                 | 2.39  | 0.68  | 2   |
| Mood STRESS    | VC     | 153 | 6.00  | 12.00                | 13.27 | 13.00  | 14.00                | 21.00 | 2.00  | 0   |
|                | GL     | 102 | 11.00 | 12.00                | 13.62 | 13.00  | 14.00                | 23.00 | 2.00  | 0   |
|                | all    | 255 | 6.00  | 12.00                | 13.41 | 13.00  | 14.00                | 23.00 | 2.00  | 0   |
| Mood AROUSAL   | VC     | 153 | 18.00 | 22.00                | 22.97 | 23.00  | 24.00                | 30.00 | 2.00  | 0   |
|                | GL     | 102 | 16.00 | 22.00                | 23.06 | 24.00  | 24.00                | 27.00 | 2.00  | 0   |
|                | all    | 255 | 16.00 | 22.00                | 23.01 | 24.00  | 24.00                | 30.00 | 2.00  | 0   |
| PARK TOT       | VC     | 153 | 0.00  | 0.00                 | 0.57  | 0.00   | 1.00                 | 4.00  | 1.00  | 0   |
|                | GL     | 102 | 0.00  | 0.00                 | 0.49  | 0.00   | 1.00                 | 5.00  | 1.00  | 0   |
|                | all    | 255 | 0.00  | 0.00                 | 0.54  | 0.00   | 1.00                 | 5.00  | 1.00  | 0   |
| Sleep tot      | VC     | 153 | 4.00  | 6.00                 | 8.01  | 8.00   | 10.00                | 16.00 | 4.00  | 0   |
|                | GL     | 102 | 4.00  | 5.00                 | 7.75  | 7.00   | 10.00                | 18.00 | 5.00  | 0   |
|                | all    | 255 | 4.00  | 5.00                 | 7.91  | 8.00   | 10.00                | 18.00 | 5.00  | 0   |

734

735 Table S8: GAM analysis using the CPM (Coloured Progressive Matrices) test score as  
 736 dependent variable, e.d.f.= estimated degrees of freedom.

737

| <b>Generalized (Linear) Additive Model</b>          |                        |                | 738 |
|-----------------------------------------------------|------------------------|----------------|-----|
| <b>Dependent variable: CPM</b>                      |                        |                | 739 |
| <b>Variable</b>                                     | <b>Estimate (S.E.)</b> | <b>p-value</b> |     |
| (Intercept)                                         | 23.9 (1.51)            | <0.0001        | 740 |
| Plant (Darfo Vs GL)                                 | 0.60 (2.11)            | 0.7770         | 741 |
| Plant (Breno Vs GL)                                 | 0.65 (2.39)            | 0.7860         | 742 |
| Plant (Sellero Vs GL)                               | 1.04 (3.13)            | 0.7415         | 743 |
| Gender M Vs F                                       | 2.30 (0.81)            | 0.0003         | 744 |
| Smoke (actual Vs never)                             | -0.18 (1.29)           | 0.8891         | 745 |
| Smoke (ex Vs never)                                 | 0.10 (0.80)            | 0.9023         | 746 |
| Alcohol (0,20] Vs no                                | -0.16 (0.89)           | 0.8541         | 747 |
| Alcohol(20,50] Vs no                                | -1.66 (0.93)           | 0.0753         | 748 |
| Alcohol(>50) Vs no                                  | -1.65 (1.19)           | 0.1644         | 749 |
| <b>Non parametric (smooth) part</b>                 |                        |                | 750 |
| <b>Variable</b>                                     | <b>e.d.f.</b>          | <b>p.value</b> |     |
| log <sub>10</sub> (Soil Mn)                         | 0.63                   | 0.0970         | 751 |
| log <sub>10</sub> (Air Mn)                          | 0.00                   | 0.6544         | 752 |
| log <sub>10</sub> (Blood Mn)                        | 0.90                   | 0.1127         | 753 |
| log <sub>10</sub> (Urinary Mn)                      | 0.00                   | 0.7520         | 754 |
| log <sub>10</sub> (Blood Pb)                        | 0.00                   | 0.4788         | 755 |
| Age                                                 | 1.13                   | <0.0001        | 756 |
| log <sub>10</sub> (Distance from the nearest plant) | 3.44                   | 0.0025         | 757 |

758

759

760

761

762

763

764

765

766

767

768

769

770 Table S9: GAM model: Trailmaking Test as dependent variable, e.d.f.= estimated degrees of  
 771 freedom.

772

---

**Generalized (Linear) Additive Model**  
**Dependent variable: TMT**

---

| <b>Variable</b>         | <b>Estimate (S.E.)</b> | <b>p-value</b> |
|-------------------------|------------------------|----------------|
| (Intercept)             | 32.8 (3.55)            | <0.0001        |
| Plant (Darfo Vs GL)     | -9.32 (4.57)           | 0.0426         |
| Plant (Breno Vs GL)     | -1.90 (5.53)           | 0.7312         |
| Plant (Sellero Vs GL)   | -0.19 (6.88)           | 0.9784         |
| Gender M Vs F           | 0.68 (2.95)            | 0.8177         |
| Smoke (actual Vs never) | 5.02 (4.60)            | 0.2762         |
| Smoke (ex Vs never)     | -1.42 (2.82)           | 0.6144         |
| Alcohol (0,20] Vs no    | 4.05 (3.09)            | 0.1908         |
| Alcohol(20,50] Vs no    | -3.00 (3.31)           | 0.3655         |
| Alcohol(>50) Vs no      | -1.36 (4.22)           | 0.7475         |

---

**Non parametric (smooth) part**

| <b>Variable</b>                                     | <b>e.d.f.</b> | <b>p.value</b> |
|-----------------------------------------------------|---------------|----------------|
| log <sub>10</sub> (Soil Mn)                         | 0.59          | 0.2304         |
| log <sub>10</sub> (Air Mn)                          | 1.48          | 0.1094         |
| log <sub>10</sub> (Blood Mn)                        | 1.02          | 0.0645         |
| log <sub>10</sub> (Urinary Mn)                      | 0.86          | 0.0074         |
| log <sub>10</sub> (Blood Pb)                        | 0.00          | 0.4856         |
| Age                                                 | 0.72          | 0.0598         |
| log <sub>10</sub> (Distance from the nearest plant) | 0.00          | 0.3383         |

---

773

774

775

776

777

778

779

780

781

782



783 Table S10: GAM model: PRL as dependent variable, e.d.f.= estimated degrees of freedom.

784

---

**Generalized (Linear) Additive Model**

**Dependent variable: PRL**

---

| <b>Variable</b>         | <b>Estimate (S.E.)</b> | <b>p-value</b> |
|-------------------------|------------------------|----------------|
| (Intercept)             | 1.01 (0.02)            | <0.0001        |
| Plant (Darfo Vs GL)     | 0.06 (0.03)            | 0.0702         |
| Plant (Breno Vs GL)     | -0.05 (0.03)           | 0.1042         |
| Plant (Sellero Vs GL)   | -0.10 (0.04)           | 0.0085         |
| Gender M Vs F           | -0.04 (0.03)           | 0.1847         |
| Smoke (actual Vs never) | -0.13 (0.05)           | 0.0079         |
| Smoke (ex Vs never)     | 0.02 (0.03)            | 0.4019         |
| Alcohol (0,20] Vs no    | -0.03 (0.03)           | 0.2874         |
| Alcohol(20,50] Vs no    | 0.003 (0.03)           | 0.9371         |
| Alcohol(>50) Vs no      | -0.009 (0.04)          | 0.8447         |

---

**Non parametric (smooth) part**

| <b>Variable</b>                                     | <b>e.d.f.</b> | <b>p.value</b> |
|-----------------------------------------------------|---------------|----------------|
| log <sub>10</sub> (Soil Mn)                         | 0.00          | 1.0000         |
| log <sub>10</sub> (Air Mn)                          | 0.72          | 0.0610         |
| log <sub>10</sub> (Blood Mn)                        | 0.00          | 0.4454         |
| log <sub>10</sub> (Urinary Mn)                      | 1.76          | 0.0030         |
| log <sub>10</sub> (Blood Pb)                        | 3.68          | 0.0303         |
| Age                                                 | 0.00          | 0.6326         |
| log <sub>10</sub> (Distance from the nearest plant) | 0.00          | 0.4272         |

---

785

786

787 | Table S11” Correlation between the continuous variables (l is lor“log”, “A” is for air, “S “ is for  
788 | soil, “B” is for blood and “U” is for urine).  
789

|       | Age    | ldist  | lMnS   | lMnA   | lMnB   | lMnU   | PbB    |
|-------|--------|--------|--------|--------|--------|--------|--------|
| Age   | 1.000  | 0.163  | -0.182 | -0.053 | 0.088  | 0.095  | -0.048 |
| ldist | 0.163  | 1.000  | -0.669 | -0.246 | 0.256  | 0.056  | -0.193 |
| lMnS  | -0.182 | -0.669 | 1.000  | 0.162  | -0.166 | -0.070 | 0.055  |
| lMnA  | -0.053 | -0.246 | 0.162  | 1.000  | -0.067 | 0.018  | -0.055 |
| lMnB  | 0.088  | 0.256  | -0.166 | -0.067 | 1.000  | 0.119  | -0.158 |
| lMnU  | 0.095  | 0.056  | -0.070 | 0.018  | 0.119  | 1.000  | -0.115 |
| lPbB  | -0.048 | -0.193 | 0.055  | -0.055 | -0.158 | -0.115 | 1.000  |

790  
791  
792  
793  
794  
795  
796

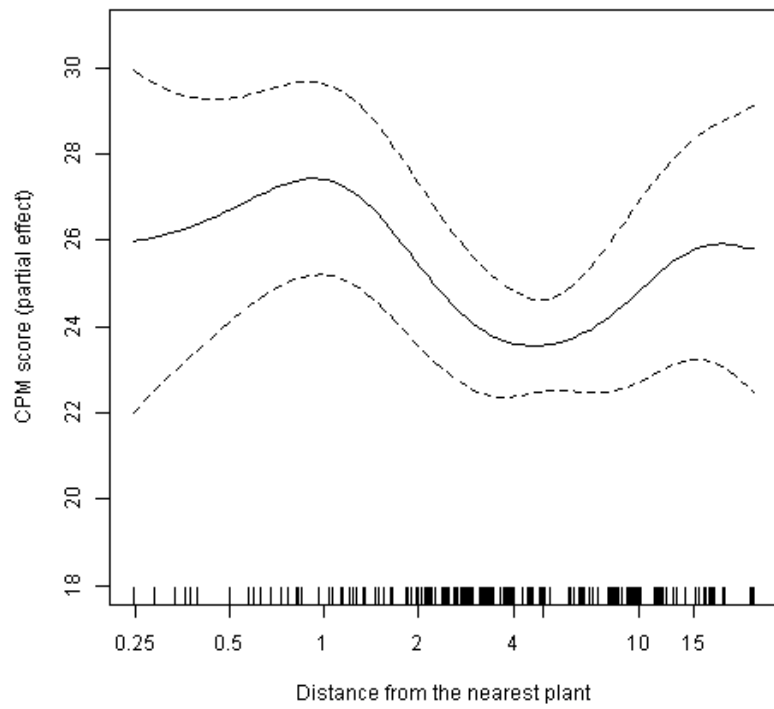

797  
798 | [Figure S12: GAM effect model of soil Mn on CPM performance-](#)  
799

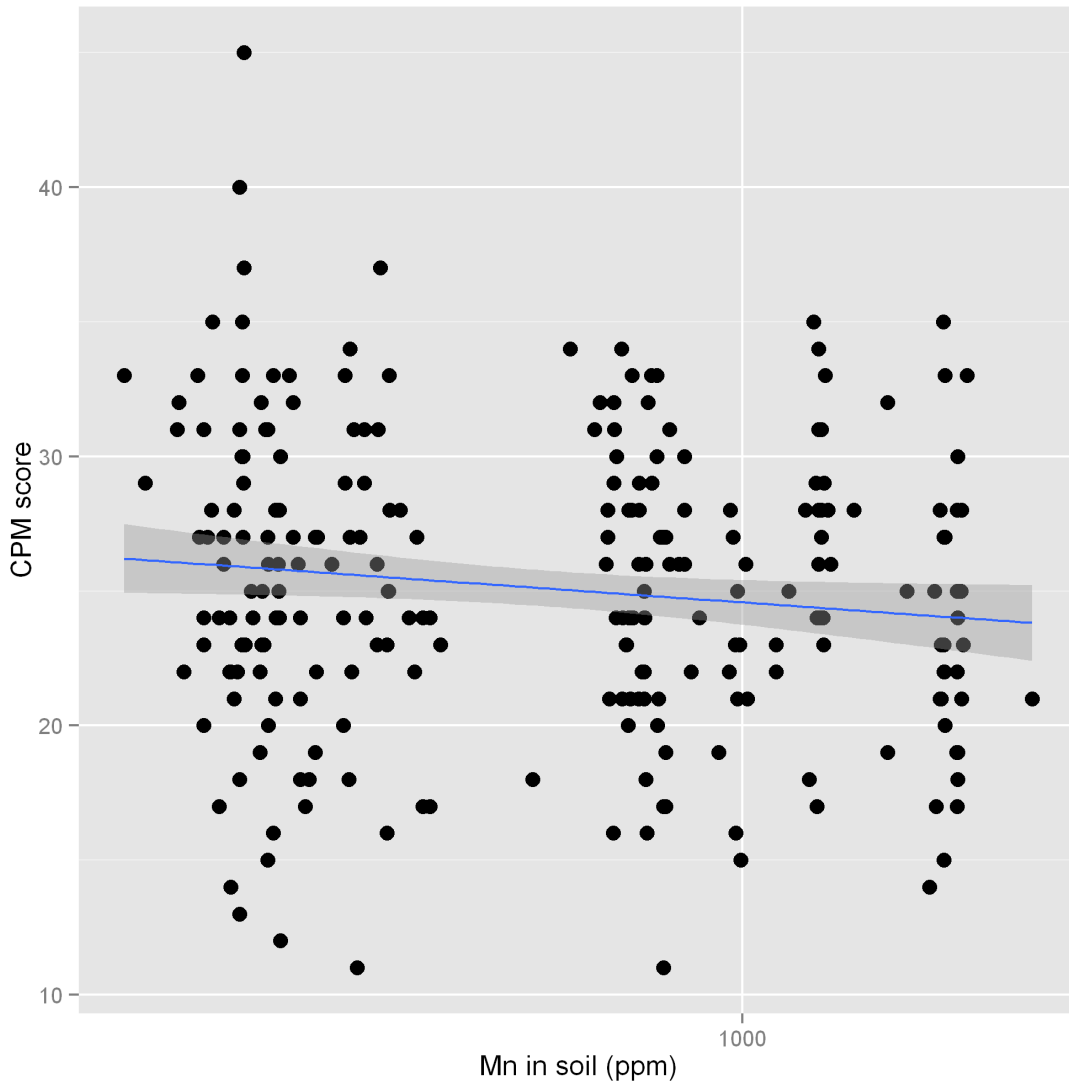

800  
801  
802  
803  
804

Figure S13: Relationship of CPM score and Mn in soil represented as a smooth function. The blue line and the shaded area represent the smoothing spline estimate and its the 95% interval.

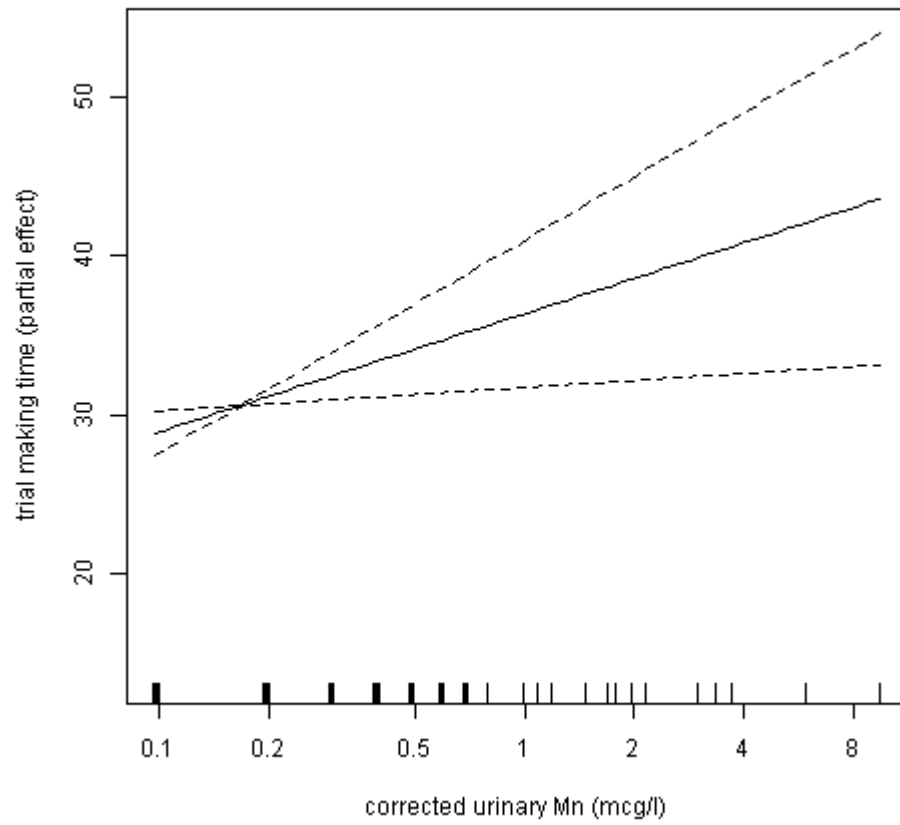

805  
806  
807 | [Figure S14: GAM effect model of urinary Mn on TMT performance.](#)  
808  
809  
810  
811  
812  
813  
814  
815  
816  
817  
818  
819
